# Supplementary material for: Elucidating the degradation mechanisms of Pt-free anode anion-exchange membrane fuel cells after durability testing
Source: Royal Society of Chemistry journal article supplement (doi:10.1039/d3ta07065d), 2024-01-01
Supplement: d3ta07065d1.pdf [file d3ta07065d1.pdf]

Electronic Supplementary Information (ESI)

**Elucidating the degradation mechanisms of Pt-free anode anion-exchange  
membrane fuel cells after durability testing**

John C. Douglin<sup>a</sup>, Ramesh K. Singh<sup>a,b</sup>, Ami C. Yang-Neyerlin<sup>c</sup>, Cheng He<sup>c</sup>, Karam Yassin<sup>a,d</sup>, Hamish A. Miller<sup>3</sup>, Maria V. Pagliaro<sup>e</sup>, Laura Capozzoli<sup>e</sup>, Enrique Carbo-Argibay<sup>f</sup>, Simon Brandon<sup>a,d</sup>, Paulo J. Ferreira<sup>f,g,h</sup>, Bryan S. Pivovar<sup>c\*</sup>, and Dario R. Dekel<sup>a,d\*</sup>

\*: Corresponding authors: bryan.pivovar@nrel.gov (Bryan S. Pivovar)  
dario@technion.ac.il (Dario R. Dekel)

<sup>a</sup>The Wolfson Department of Chemical Engineering, Technion – Israel Institute of Technology, Haifa 3200003, Israel

<sup>b</sup>CO<sub>2</sub> Research and Green Technologies Centre, Vellore Institute of Technology (VIT), Vellore 632014, Tamil Nadu, India

<sup>c</sup>Chemistry and Nanoscience Center, National Renewable Energy Laboratory (NREL), Golden, CO, 80401, USA

<sup>d</sup>The Nancy & Stephen Grand Technion Energy Program (GTEP), Technion – Israel Institute of Technology, Haifa 3200003, Israel

<sup>e</sup>Istituto di Chimica dei Composti Organometallici (CNR-ICCOM), via Madonna del Piano 10, 50019 Sesto Fiorentino, Firenze, Italy

<sup>f</sup>International Iberian Nanotechnology Laboratory (INL), Av. Mestre José Veiga s/n, 4715-330, Braga, Portugal

<sup>g</sup>Mechanical Engineering Department and IDMEC, Instituto Superior Técnico, University of Lisbon, Av. Rovisco Pais, 1049-001 Lisboa, Portugal

<sup>h</sup>Materials Science and Engineering Program, The University of Texas at Austin, Austin, Texas 78712

## Table of Contents

|                             |    |
|-----------------------------|----|
| Supplementary Figures ..... | 3  |
| Supplementary Tables.....   | 13 |

## Supplementary Figures

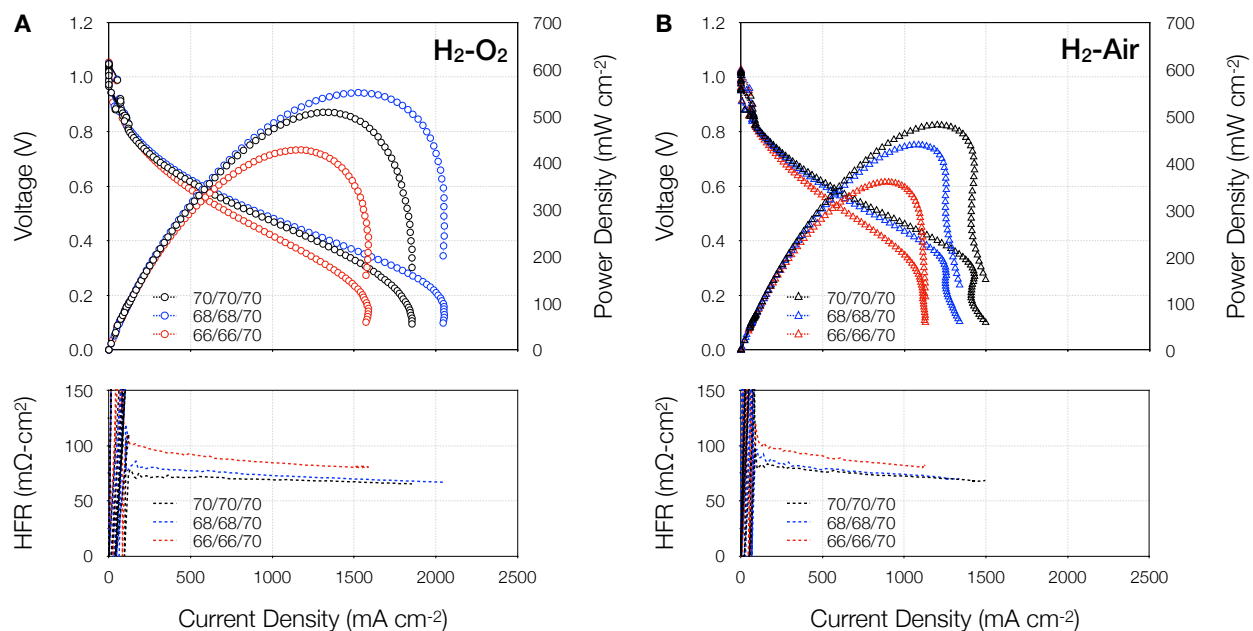

**Supplementary Figure 1.** Polarization curves of (a) H<sub>2</sub>-O<sub>2</sub> and (b) H<sub>2</sub>-Air AEMFCs with Pd/C anode and standard Pt/C cathode and their respective high-frequency resistance (HFR) plots are shown in the lower panels. The cell was operated at 70 °C with varying anode and cathode dew points. H<sub>2</sub>/O<sub>2</sub> and H<sub>2</sub>/Air flow rates were 1|1 slpm, with a backpressure of 131 kPa and specifics about the MEAs can be found in the Experimental section. The figure legends indicate anode dew point/cathode dew point/cell temperature. Horizontal gridlines in all Figures correspond to left y-axis.

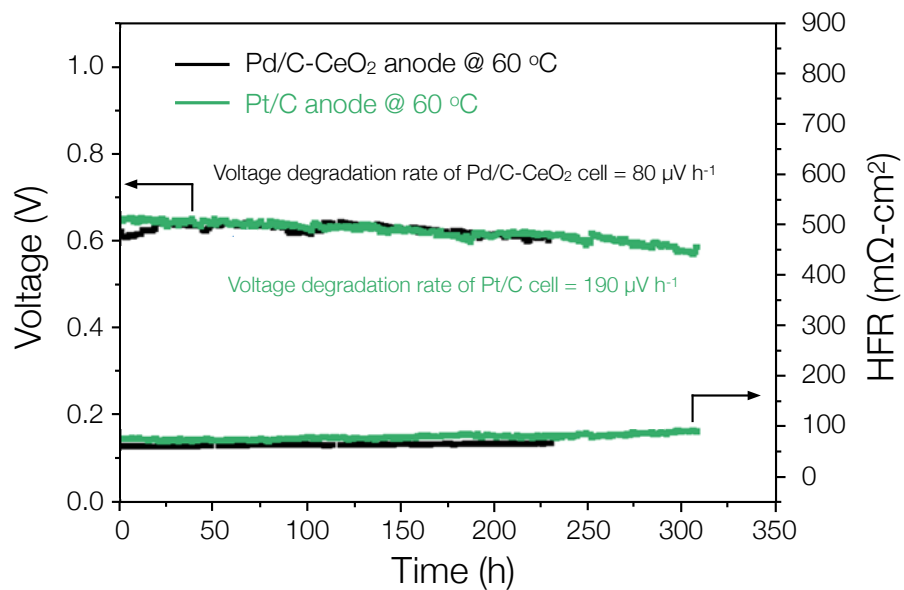

**Supplementary Figure 2.** H<sub>2</sub>-Air AEMFC durability comparison at a constant current density load of 600 mA cm<sup>-2</sup> of Pd/C-CeO<sub>2</sub> and Pt anodes at 60 °C for 230 and 310 h, respectively. The H<sub>2</sub>-Air flow rates of 1|1 slpm with a backpressure of 121 kPa on both sides and specifics about the MEAs can be found in the Experimental section. A straight-line degradation algorithm was used to calculate the voltage degradation rates listed on the plots in units of μV h<sup>-1</sup>, of which further details can be found in **Experimental Section 2.4** and **Supplementary Figure 3**.

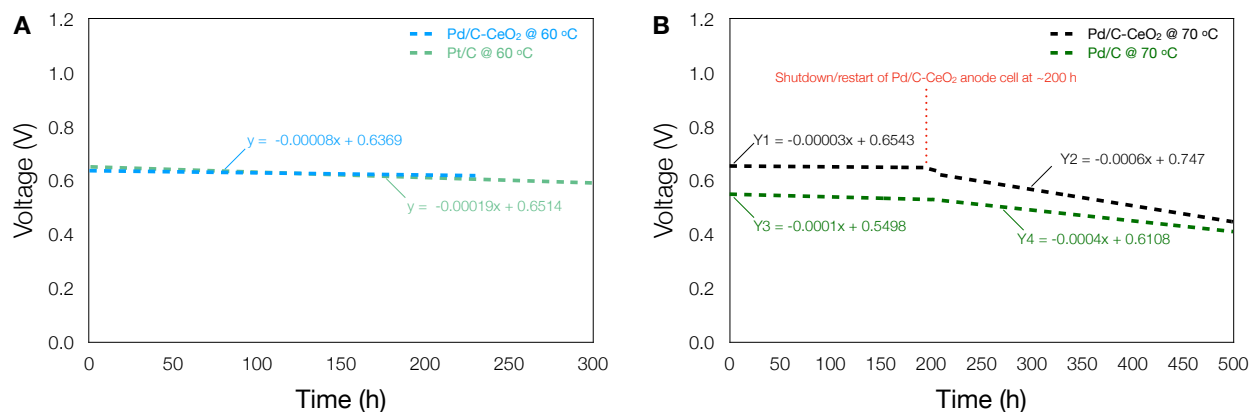

**Supplementary Figure 3.** Straight line degradation plots showing the equation of each straight line that was used to calculate the degradation rates in units of  $\mu\text{V h}^{-1}$  for (A) **Figure 2C** and **Supplementary Figure 4** and, (B) **Figure 2D**. In (B), The Pd/C-CeO<sub>2</sub> anode cell (black dashed line) was processed for ~200 h before an 8 h shutdown. Afterwards, the cell was restarted and operated at the same operating conditions for an additional 300 h, while the Pd/C anode cell (green dashed-line) operated continuously for 500 h. Further details on the algorithms used to calculate the straight-line equations can be found in Experimental Section 2.4.

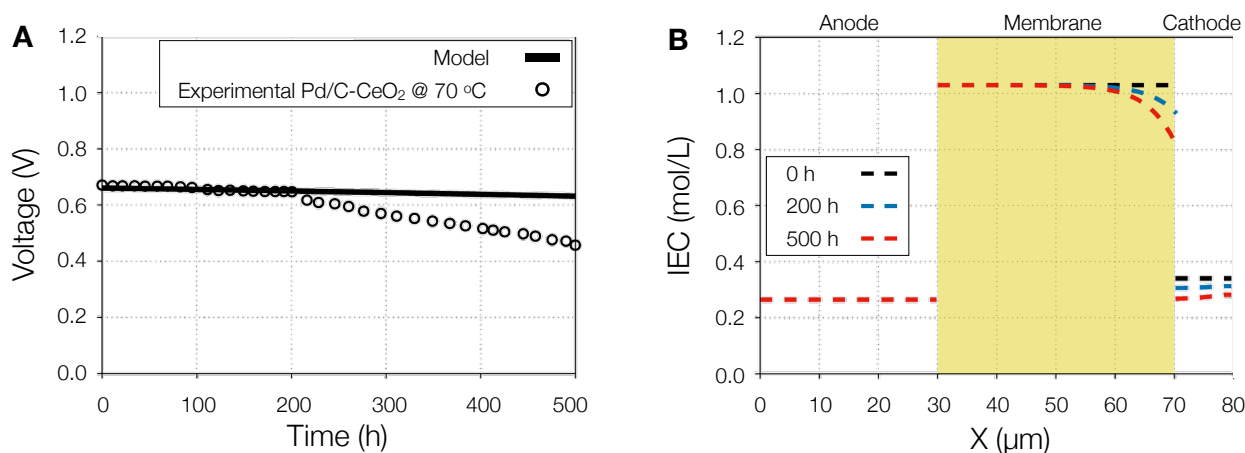

**Supplementary Figure 4.** 1D numerical modeling results of Pd/C-CeO<sub>2</sub> MEA at 70 °C: (A) cell voltage vs. time and (B) ion exchange capacity (IEC) across the cell as a function of time.

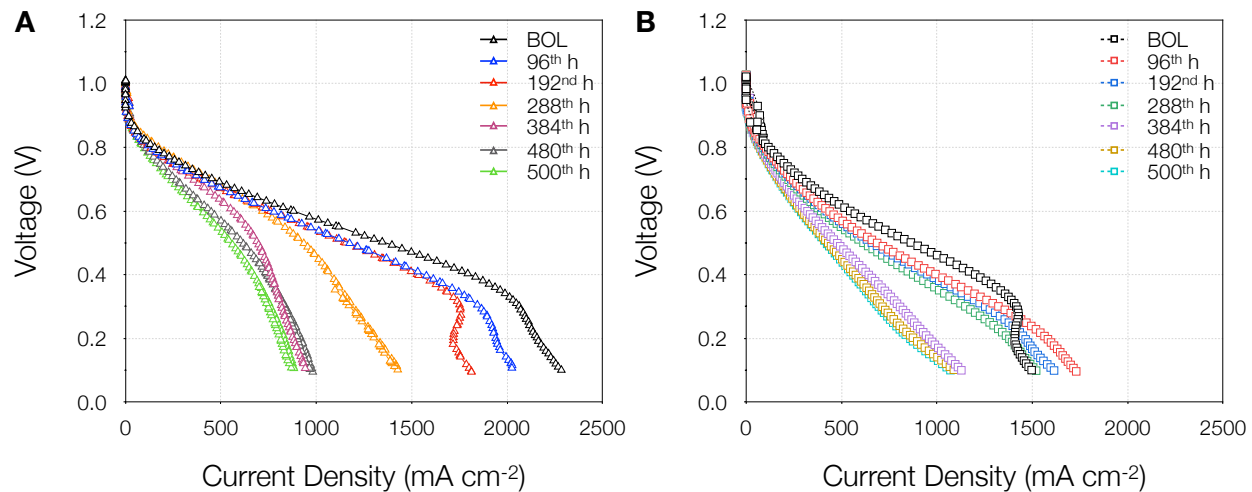

**Supplementary Figure 5.** H<sub>2</sub>-Air i-V curves at 70 °C recorded during the respective durability tests shown in **Figure 2D** at the beginning of life (BOL), 96<sup>th</sup>, 192<sup>nd</sup>, 288<sup>th</sup>, 384<sup>th</sup>, 480<sup>th</sup>, and 500<sup>th</sup> h for AEMFCs made with the (A) Pd/C-CeO<sub>2</sub> anode and, (B) Pd/C anode.

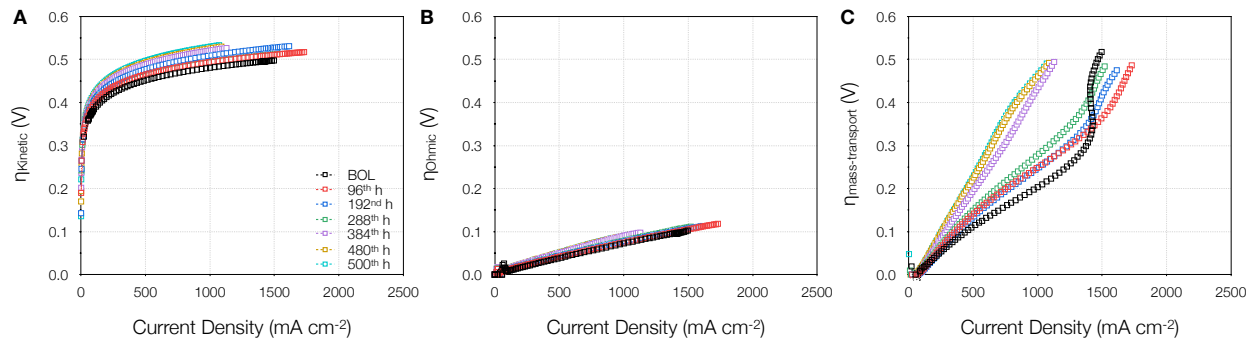

**Supplementary Figure 6.** The deconvoluted i-V curves of the Pd/C anode AEMFC operated in H<sub>2</sub>-Air at 70 °C recorded during the respective durability tests shown in **Figure 2D** at the beginning of life (BOL), 96<sup>th</sup>, 192<sup>nd</sup>, 288<sup>th</sup>, 384<sup>th</sup>, 480<sup>th</sup>, and 500<sup>th</sup> h. (A) Kinetic overpotential, (B) ohmic overpotential, and (C) mass-transport overpotential.

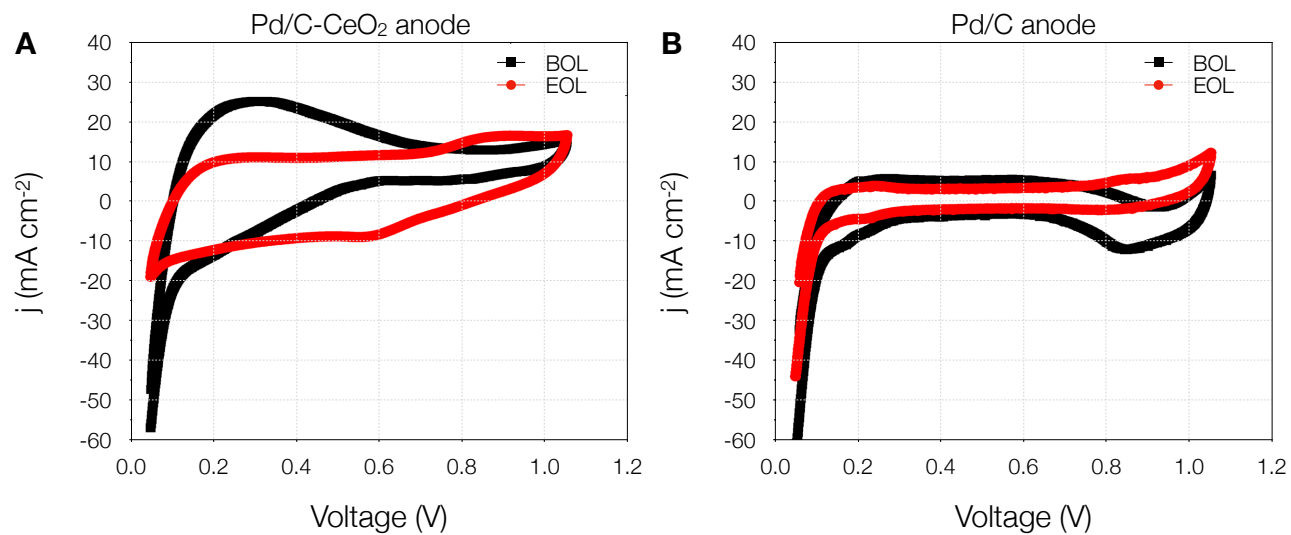

**Supplementary Figure 7.** H<sub>2</sub>/N<sub>2</sub> *in-situ* CV diagnostics for (A) Pd/C-CeO<sub>2</sub> anode and (B) Pd/C anode cells tested at 70 °C before (BOL) and after (EOL) their respective 500 h durability tests. CVs were recorded at a scan rate of 20 mV s<sup>-1</sup>.

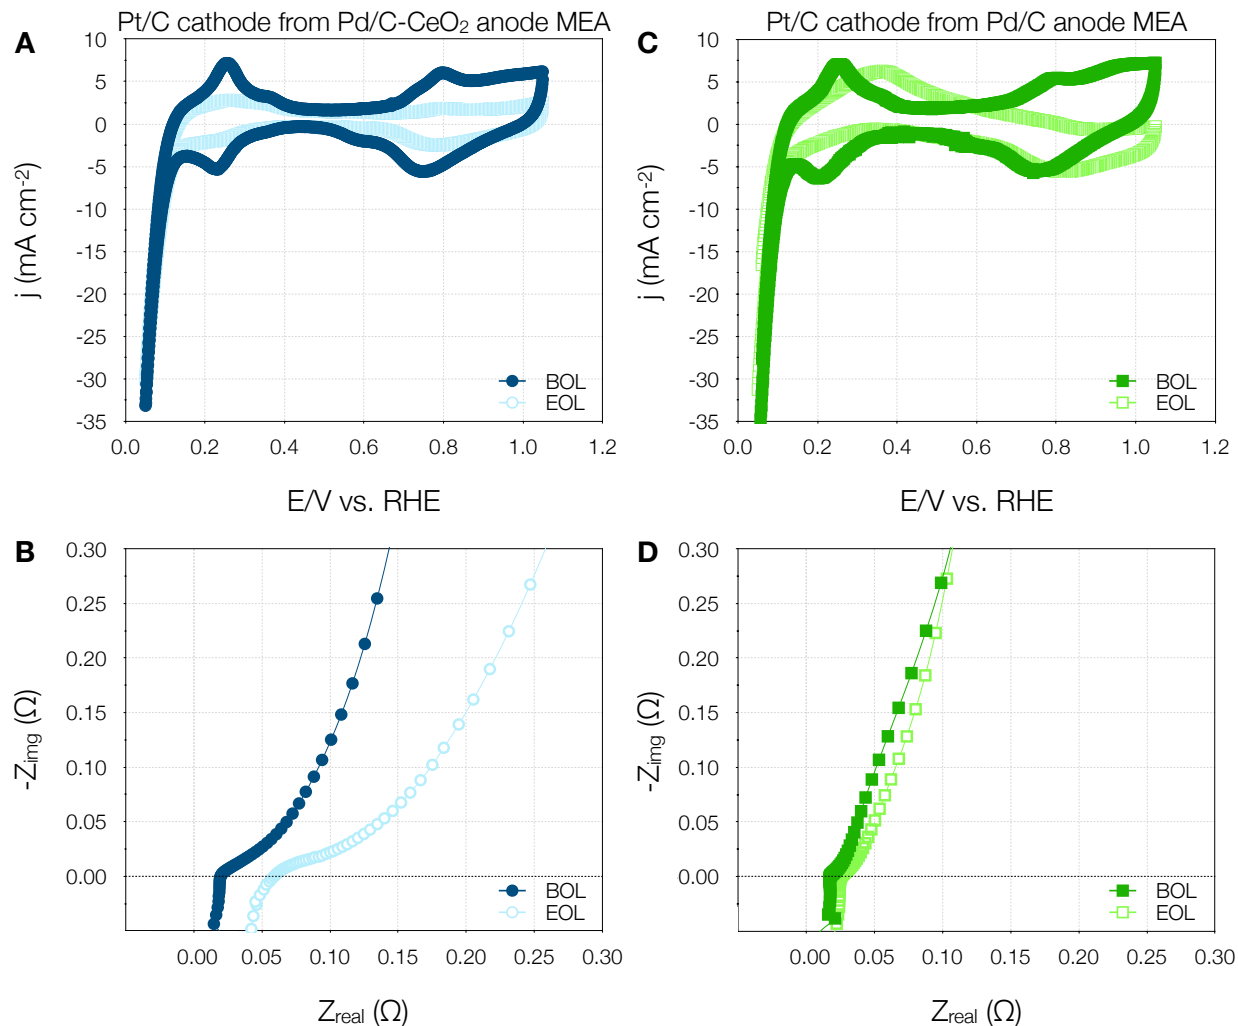

**Supplementary Figure 8.** H<sub>2</sub>/N<sub>2</sub> *in-situ* (A,C) CV and (B,D) EIS diagnostics for common Pt/C cathodes for cells tested at 70 °C, both before and after their 500 h durability tests. (A,B) correspond to the cathode for the Pd/C-CeO<sub>2</sub> anode cell, while (C,D) are for the cathode of the Pd/C anode cell. CVs (A,C) were recorded at a scan rate of 20 mV s<sup>-1</sup>.

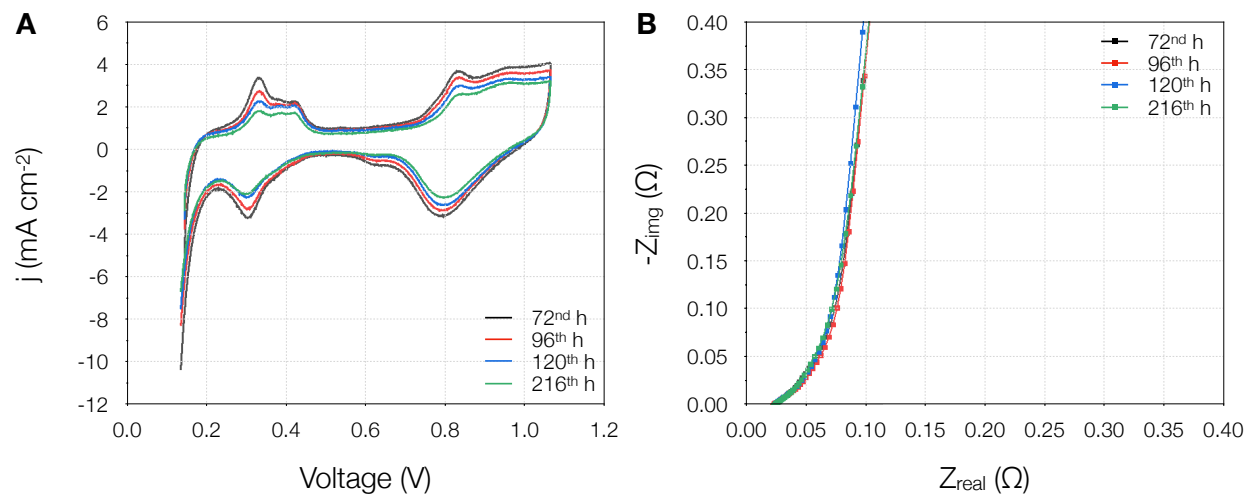

**Supplementary Figure 9.** H<sub>2</sub>/N<sub>2</sub> in-situ (A) CV and (B) EIS diagnostics for Pt/C cathode of the Pd/C-CeO<sub>2</sub> anode cell tested at 60 oC for ~200 h. CVs in (A) were recorded at a scan rate of 20 mV s<sup>-1</sup>.

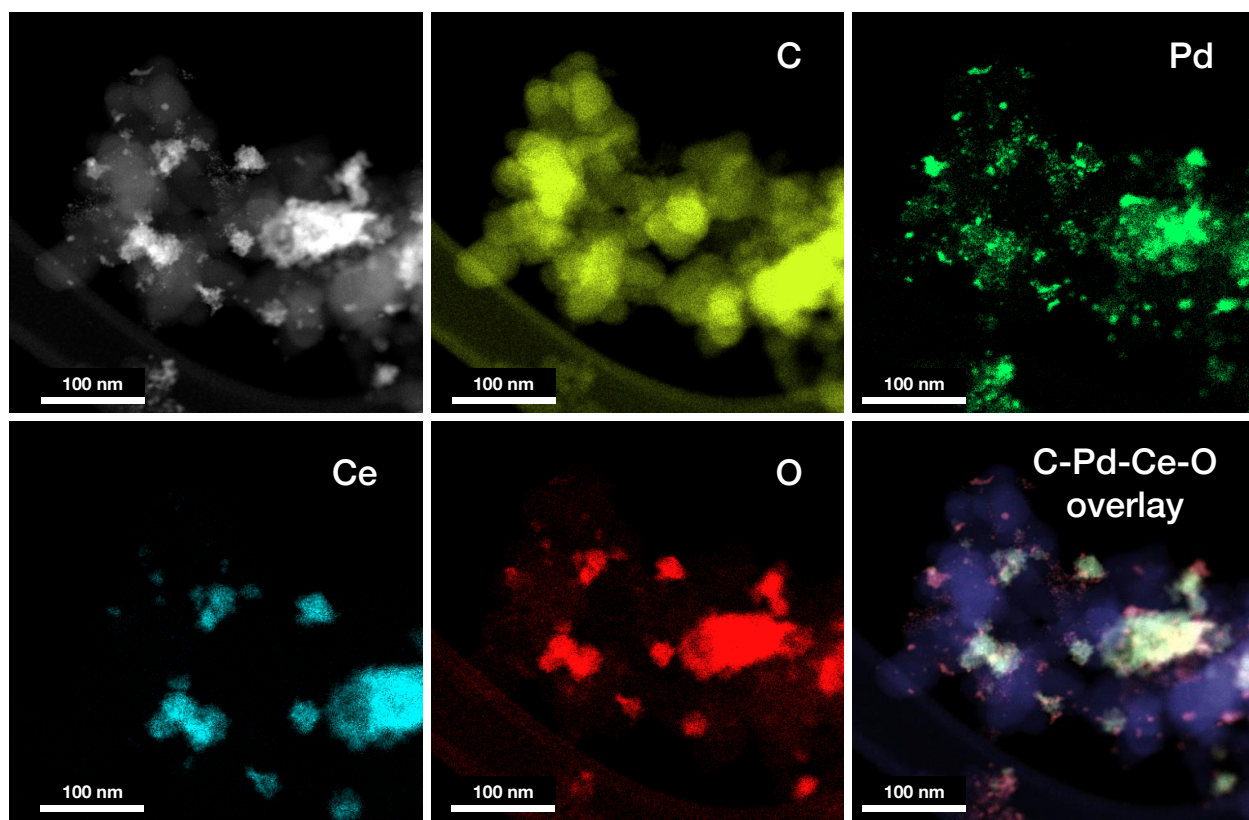

**Supplementary Figure 10.** Z-contrast STEM micrograph of pristine Pd/C-CeO<sub>2</sub> (scale bar 100 nm) and related EDAX maps for C, Pd, Ce, O, and overlay of C, Pd, Ce, and O.

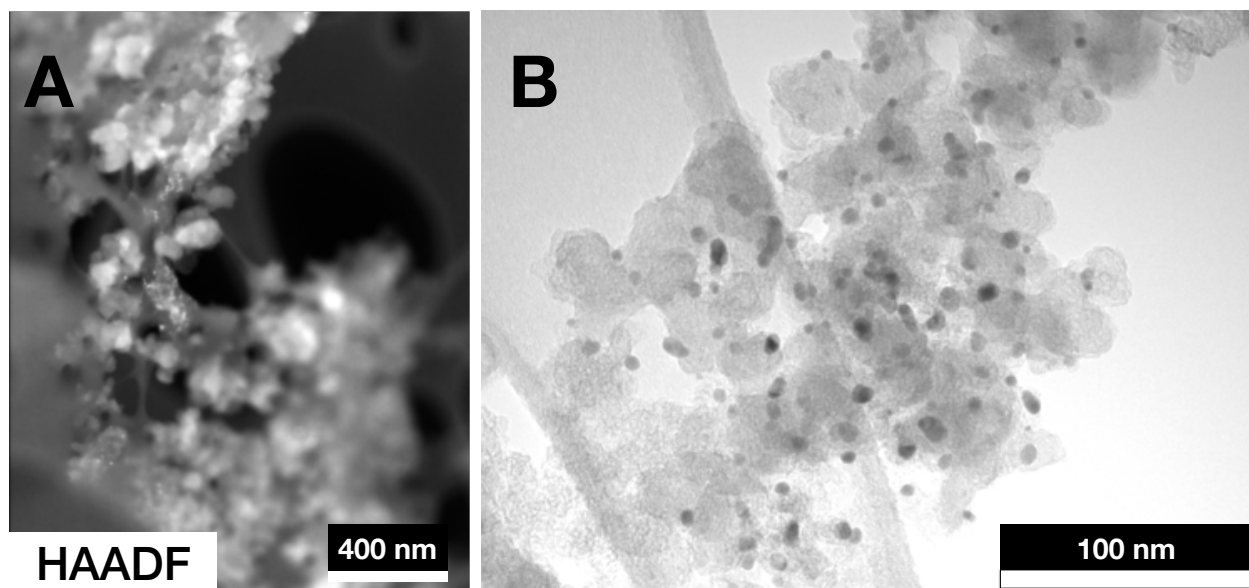

**Supplementary Figure 11.** (A) HAADF and (B) TEM images of the pristine Pd/C catalyst.

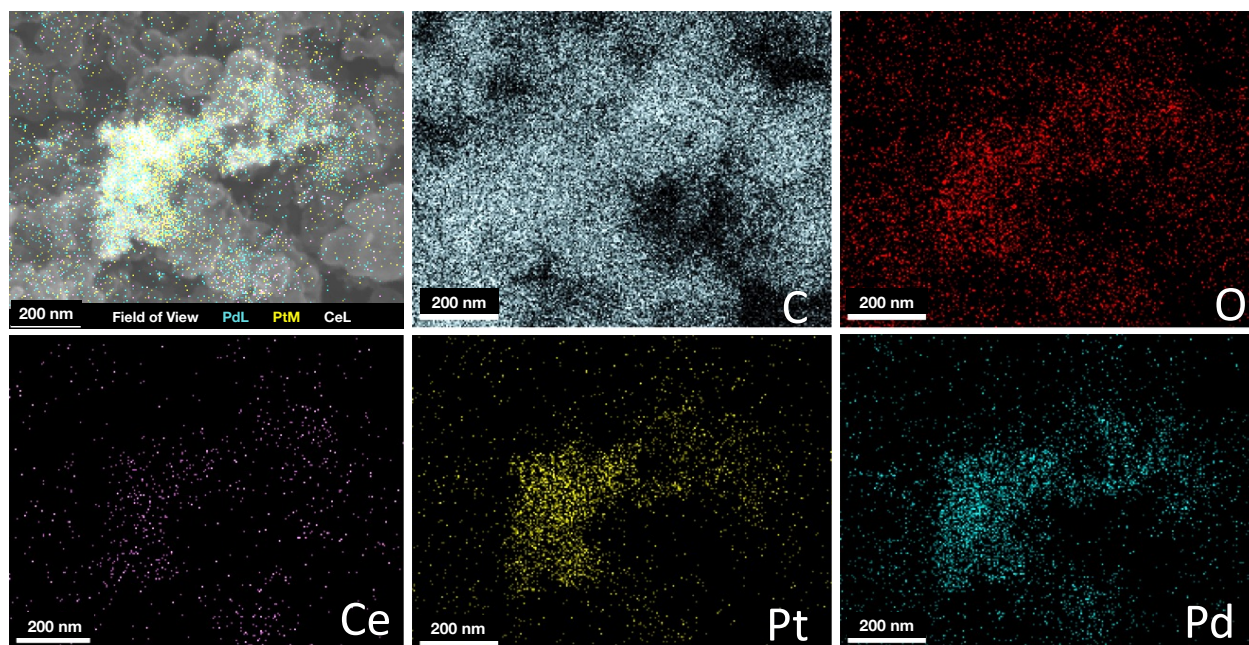

**Supplementary Figure 12.** Higher magnification SEM image of a representative area of the Pd/C-CeO<sub>2</sub> anode catalyst layer GDE surface after 500 h AEMFC durability testing. Corresponding elemental maps for C, O, Ce, Pt, and Pd.

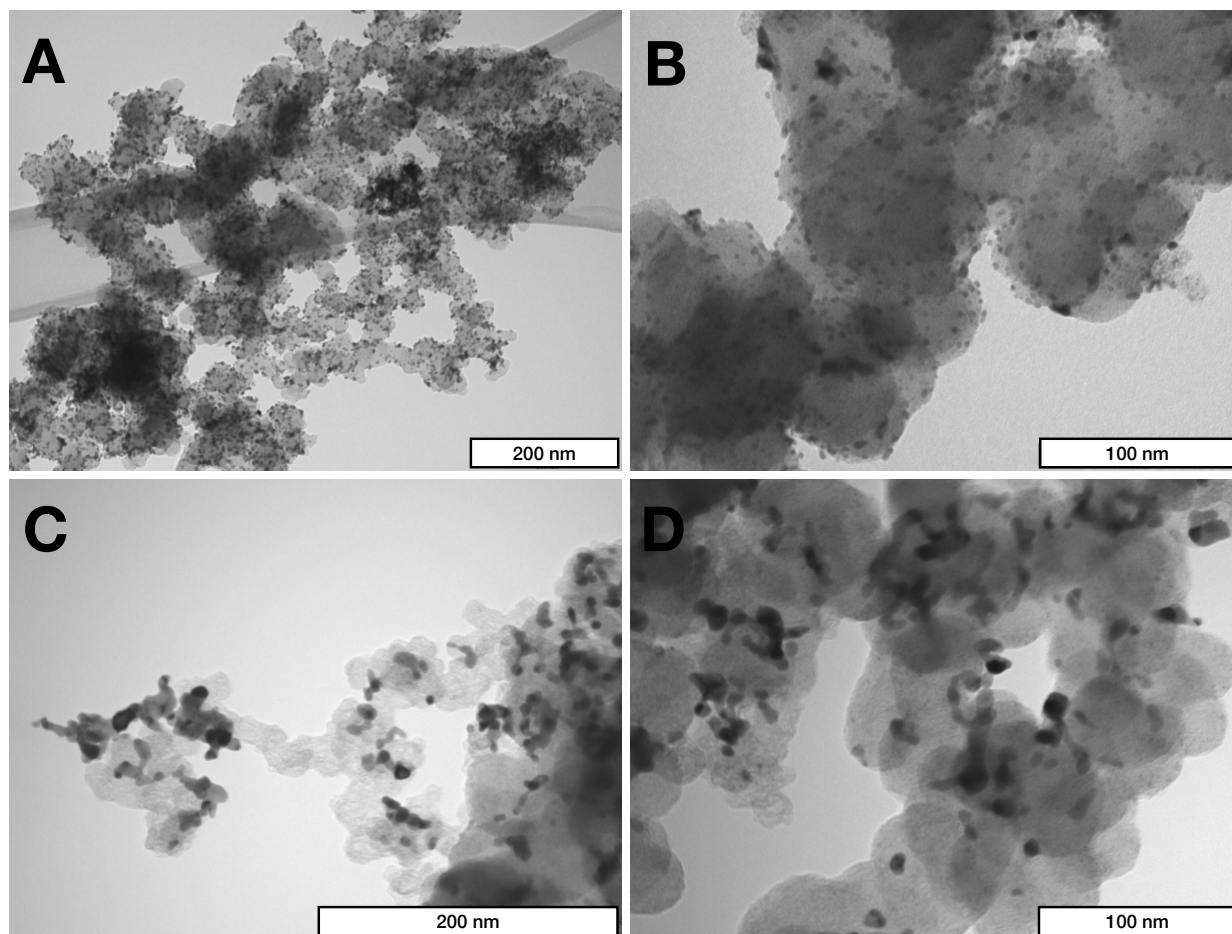

**Supplementary Figure 13.** (A, B) TEM images of pristine Pt/C and (C, D) Pt/C after 500 h AEMFC test.

## Supplementary Tables

**Supplementary Table 1.** Cell performance parameters, namely open circuit voltage, corresponding current density values at 0.8, 0.6, and 0.4 V, limiting current density and voltage efficiency, of H<sub>2</sub>-O<sub>2</sub> and H<sub>2</sub>-Air AEMFCs operated at 70 °C using Pd/C-CeO<sub>2</sub> anodes.

| Anode-Cathode Feed                        | OCV (V) | j@0.8 V (mA cm <sup>-2</sup> ) | j@0.6 V (mA cm <sup>-2</sup> ) | j@0.4 V (mA cm <sup>-2</sup> ) | j <sub>lim</sub> (mA cm <sup>-2</sup> ) | η <sub>v</sub> <sup>a</sup> |
|-------------------------------------------|---------|--------------------------------|--------------------------------|--------------------------------|-----------------------------------------|-----------------------------|
| H <sub>2</sub> -O <sub>2</sub> (70/70/70) | 1.042   | 266.9                          | 1108.6                         | 1913.2                         | 2622.9                                  | 0.51                        |
| H <sub>2</sub> -O <sub>2</sub> (68/68/70) | 1.041   | 228.2                          | 1052.6                         | 2249.4                         | 3449.3                                  | 0.50                        |
| H <sub>2</sub> -O <sub>2</sub> (66/66/70) | 1.040   | 154.3                          | 910.1                          | 2160.7                         | 3581.8                                  | 0.47                        |
| H <sub>2</sub> -Air (70/70/70)            | 1.012   | 152.7                          | 867.0                          | 1794.2                         | 2284.5                                  | 0.46                        |
| H <sub>2</sub> -Air (68/68/70)            | 1.010   | 134.2                          | 799.4                          | 1717.8                         | 2303.4                                  | 0.44                        |
| H <sub>2</sub> -Air (66/66/70)            | 1.011   | 113.3                          | 662.1                          | 1528.2                         | 2096.6                                  | 0.42                        |

<sup>a</sup> Voltage efficiencies are calculated from thermodynamic cell voltage ( $\eta_v = V/E_{\text{cell}}$ ) at 1000 mA cm<sup>-2</sup>, V: operating cell voltage @1000 mA cm<sup>-2</sup> and E<sub>cell</sub>: thermodynamic cell voltage of 1.23 V

**Supplementary Table 2.** Optimized cell performance parameters, namely open circuit voltage, corresponding current density values at 0.8, 0.6, and 0.4 V, limiting current density and voltage efficiency, of H<sub>2</sub>-O<sub>2</sub> and H<sub>2</sub>-Air AEMFC operated at 70°C using Pd/C-CeO<sub>2</sub> and Pd/C anodes.

| Anode-Cathode Feed                        | Anode                  | OCV (V) | j@0.8 V (mA cm <sup>-2</sup> ) | j@0.6 V (mA cm <sup>-2</sup> ) | j@0.4 V (mA cm <sup>-2</sup> ) | j <sub>lim</sub> (mA cm <sup>-2</sup> ) | η <sub>v</sub> <sup>a</sup> |
|-------------------------------------------|------------------------|---------|--------------------------------|--------------------------------|--------------------------------|-----------------------------------------|-----------------------------|
| H <sub>2</sub> -O <sub>2</sub> (68/68/70) | Pd/C                   | 1.051   | 135.9                          | 571.0                          | 1349.0                         | 2047.7                                  | 0.39                        |
| H <sub>2</sub> -O <sub>2</sub> (68/68/70) | Pd-CeO <sub>2</sub> /C | 1.041   | 228.2                          | 1052.6                         | 2249.4                         | 3449.3                                  | 0.50                        |
| H <sub>2</sub> -Air (70/70/70)            | Pd/C                   | 1.022   | 116.7                          | 545.8                          | 1200.6                         | 1496.4                                  | 0.38                        |
| H <sub>2</sub> -Air (70/70/70)            | Pd-CeO <sub>2</sub> /C | 1.012   | 152.7                          | 867.0                          | 1794.2                         | 2284.5                                  | 0.46                        |

<sup>a</sup> Voltage efficiencies are calculated from thermodynamic cell voltage ( $\eta_v = V/E_{\text{cell}}$ ) at 1000 mA cm<sup>-2</sup>, V: operating cell voltage @1000 mA cm<sup>-2</sup> and E<sub>cell</sub>: thermodynamic cell voltage of 1.23 V

**Supplementary Table 3.** EIS results of Pd/C-CeO<sub>2</sub> and Pd/C at the beginning of life (BoL) and end of life (EoL) of the durability test.

| Anode Catalysts             | High-frequency resistance (mΩ-cm <sup>2</sup> ) | Catalyst layer ionomer resistance |
|-----------------------------|-------------------------------------------------|-----------------------------------|
| Pd/C-CeO <sub>2</sub> (BOL) | 108                                             | 149                               |
| Pd/C-CeO <sub>2</sub> (EOL) | 302                                             | 160                               |
| Pd/C (BOL)                  | 93                                              | 46                                |
| Pd/C (EOL)                  | 118                                             | 63                                |

BOL- beginning of life, EOL: end of life
